# Supplementary material for: Synthesis of uniformly dispersed Fe2TiO5 nanodisks: a sensitive photoelectrochemical sensor for glucose monitoring in human blood serum
Source: Royal Society of Chemistry journal article supplement (doi:10.1039/d3an01265d), 2023-01-01
Supplement: d3an01265d1.pdf [file d3an01265d1.pdf]

## Electronic Supplementary Information

### Synthesis of uniformly dispersed Fe<sub>2</sub>TiO<sub>5</sub> nanodisks: A super sensitive photoelectrochemical sensor for glucose monitoring in human blood serum

Wenbo Lu,<sup>\*a</sup> Rui Zhang,<sup>a</sup> Xue Zhang,<sup>a</sup> Yufen Shi,<sup>a</sup> Yupeng Wang,<sup>a</sup> Huanhuan Shi<sup>\*b</sup>

<sup>a</sup>Key Laboratory of Magnetic Molecules and Magnetic Information Materials

(Ministry of Education), School of Chemistry and Material Science, Shanxi Normal

University, Taiyuan 030031, China.

<sup>b</sup>Institut für Quanten Materialien und Technologien, Karlsruher Institut für

Technologie (KIT), Hermann-v.-Helmholtz-Platz 1, 76344, Eggenstein-Leopoldshafen,

Germany.

*\*Corresponding author:*

*E-mail:* [luwb@sxnu.edu.cn](mailto:luwb@sxnu.edu.cn) ; [huanhuan.shi@kit.edu](mailto:huanhuan.shi@kit.edu)

## **Experimental section**

### **Materials and reagents**

Lactose, maltose, Terephthalic Acid, Titanium (IV) isopropoxide were purchased from Aladin Ltd. (Shanghai, China). Potassium ferricyanide trihydrate, Iron nitrate nonahydrate, Polyvinylpyrrolidone (PVP) were obtained from Guangfu Fine Chemical Research Institute (Tianjin, China). Cytosine, thymine, Sodium sulfate anhydrous were provided from Sinopharm Chemical Reagent Co. Ltd. (Shanghai, China). Potassium ferricyanide, Potassium chloride, Methanol, N,N-Dimethylformamide (DMF) were supplied by Tianjin Guangfu Technology Development Co. Ltd. (Tianjin, China). All reagents were used as received without further purification.

### **Apparatus**

A typical three-electrode system was used to collect electrochemical data. To be specific, a platinum wire as a counter-electrode, the Ag/AgCl electrode was employed as the reference electrode and modified ITO electrode acted as the working electrode. Before preparation of PEC sensor, ITO substrates were cleaned by immersion for ultrasonically agitated in acetone, 1 M NaOH, deionized water solvents

### **Preparation of working electrode**

Firstly, the conductive surface of ITO conductive glass electrode was measured by universal meter, and the non-conductive side was cut to ensure the integrity of the conductive side. Cut it into 2 cm × 1 cm using a glass knife. Then, the ITO conductive glass was treated with ultrasound in acetone solution, 1 M NaOH aqueous solution and deionized water for 15 minutes respectively. The paster was attached to the center of one end of ITO electrode, and the transparent surface was completely covered with glue. After the glue was dried, the paster was removed, and the transparent surface with the same size was retained. Then 5 mg Fe<sub>2</sub>TiO<sub>5</sub> was completely dissolved in 20 μL ultrapure water and 20 μL 0.5% nafion, drop 1μL configured material on the ITO.

### **Preparation of human blood serum**

The human blood was put into 45 °C water bath to maintain 10 minutes and then centrifuged at 4000 r/min for 5 minutes. Human blood serum was obtained by collected the supernate. The disposed serum is kept in -5 °C to -20 °C.

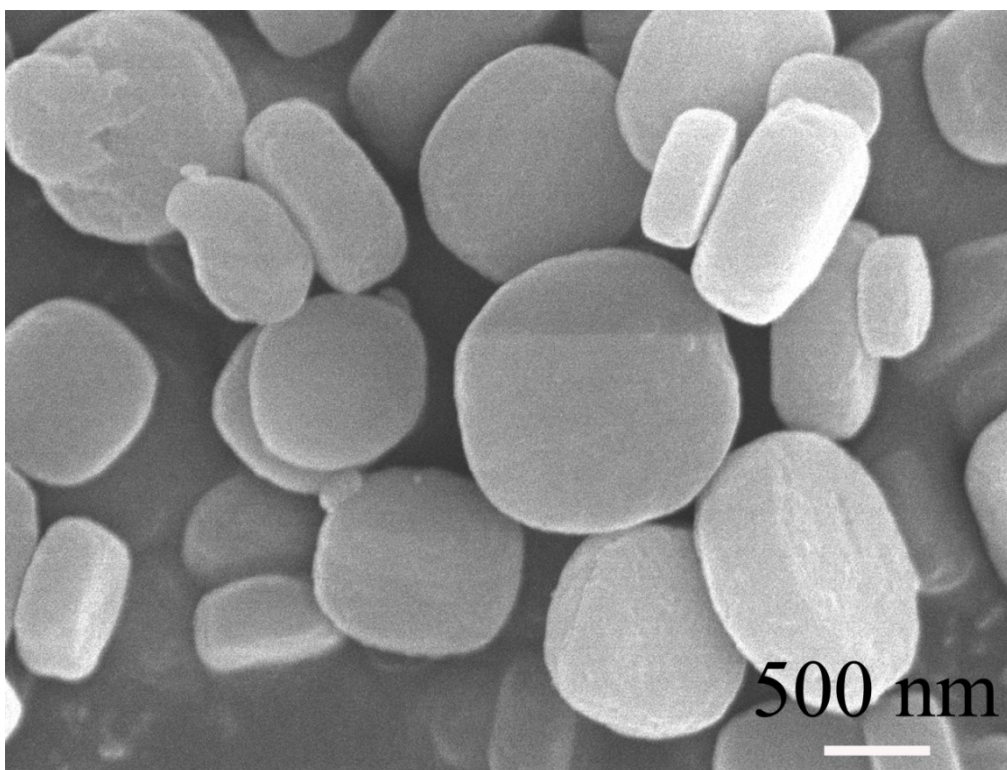

**Fig. S1.** SEM image of Fe-Ti-O nanodisks.

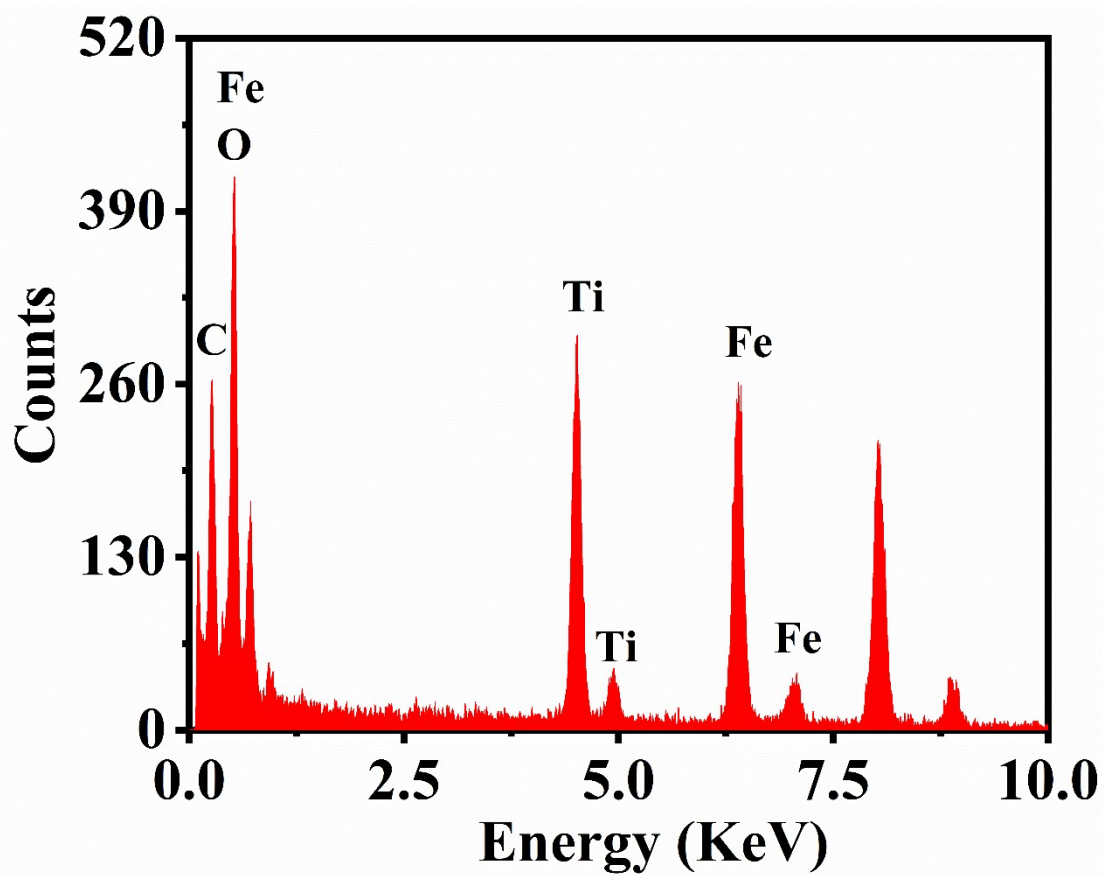

Fig. S2. EDS elemental mappings of Fe, Ti, and O elements in  $\text{Fe}_2\text{TiO}_5$ .

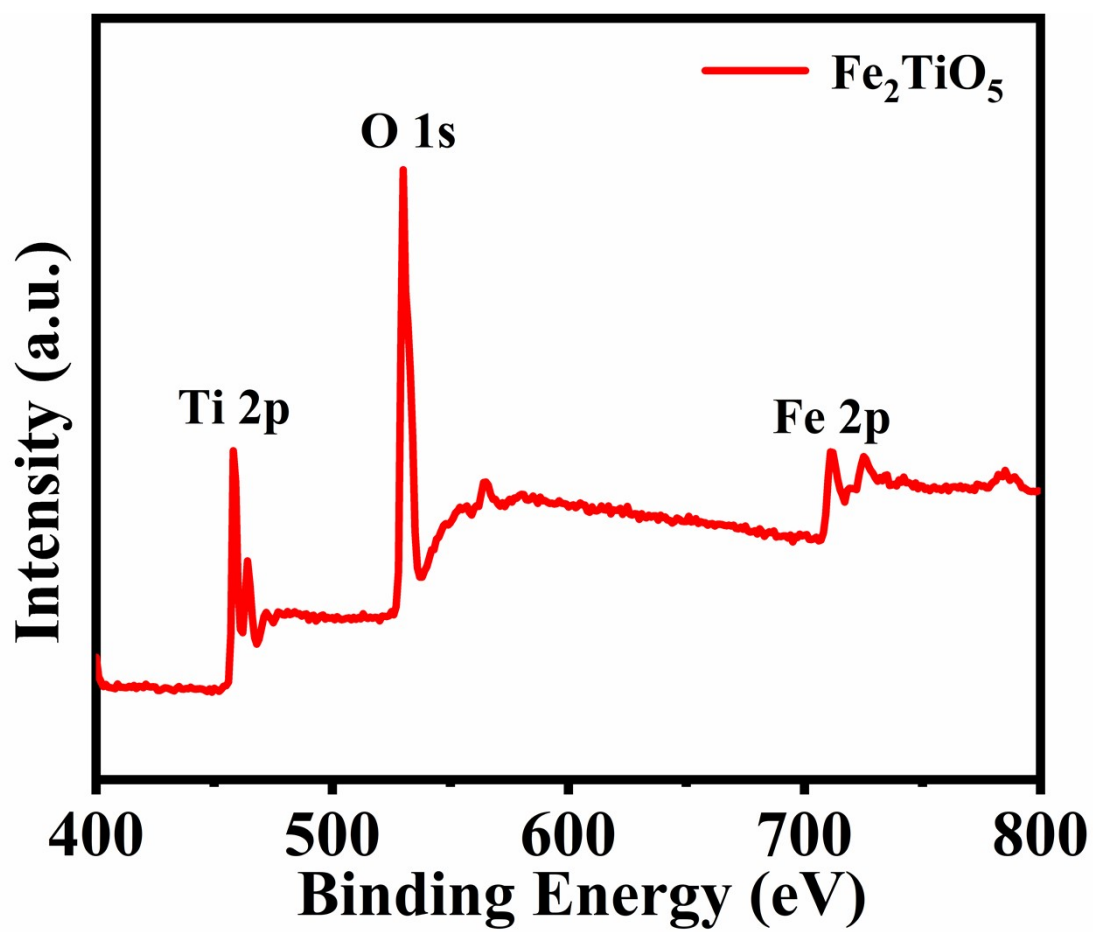

Fig. S3. XPS survey spectrum of Fe<sub>2</sub>TiO<sub>5</sub> nanodisks.

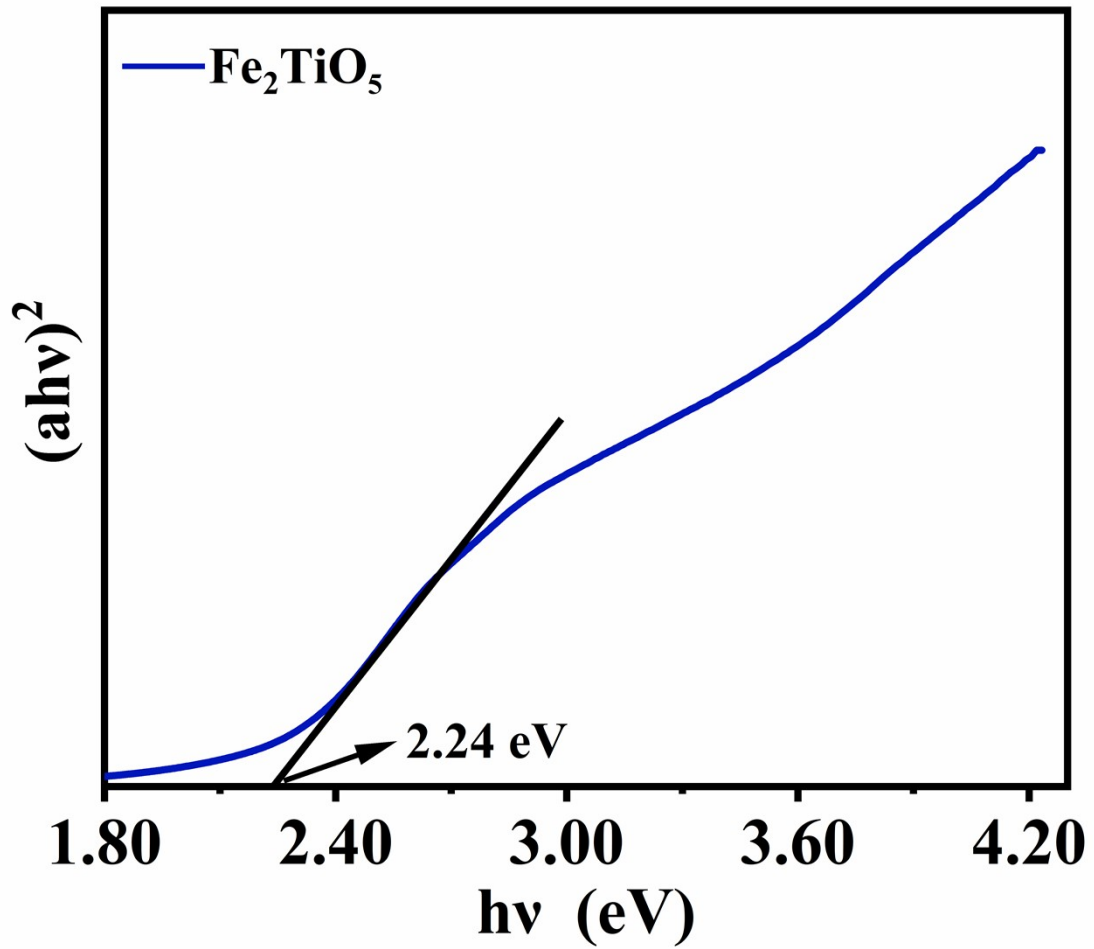

**Fig. S4.** Bandgap plots estimated by using **Tauc plot** for Fe<sub>2</sub>TiO<sub>5</sub>.

**Tauc plot:** the above cutting line method is applicable to the direct bandgap of transmission spectrum that limits its large application. Tauc plot is mainly based on the formula proposed by Tauc, Davis and Mott et al.

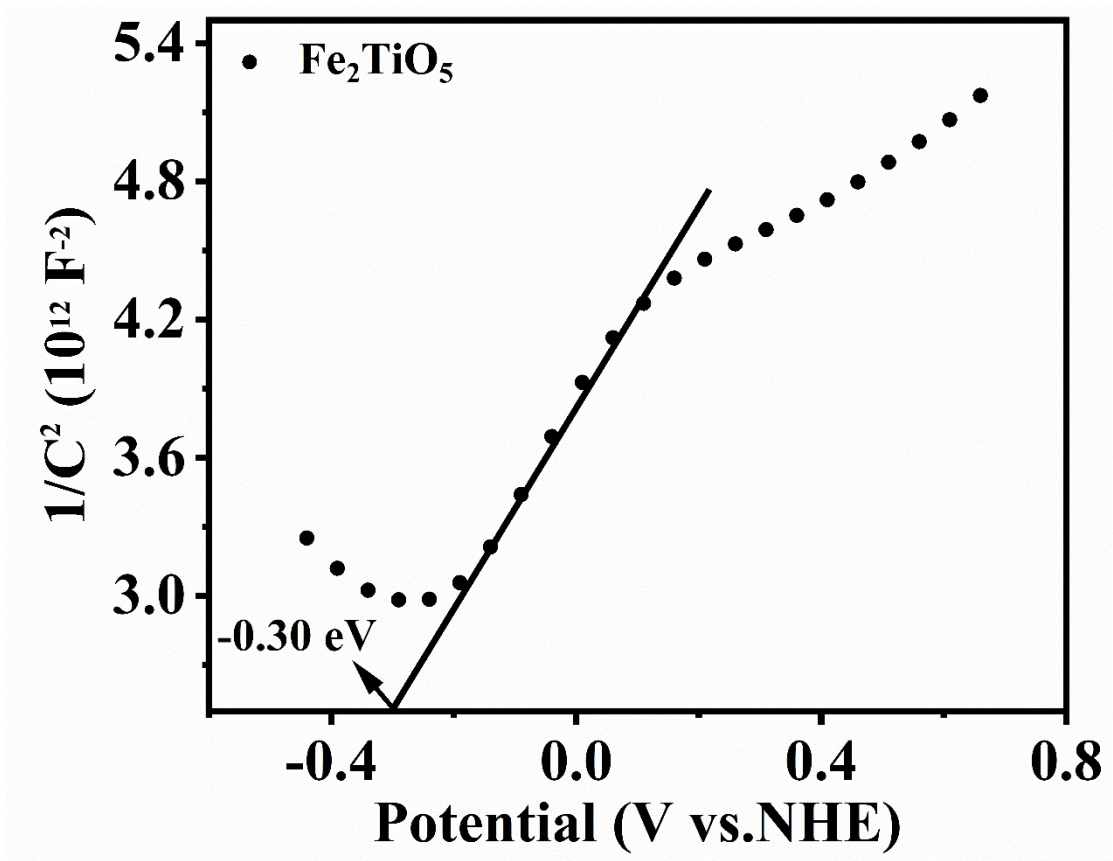

Fig. S5. Mott-Schottky plots of Fe<sub>2</sub>TiO<sub>5</sub>.



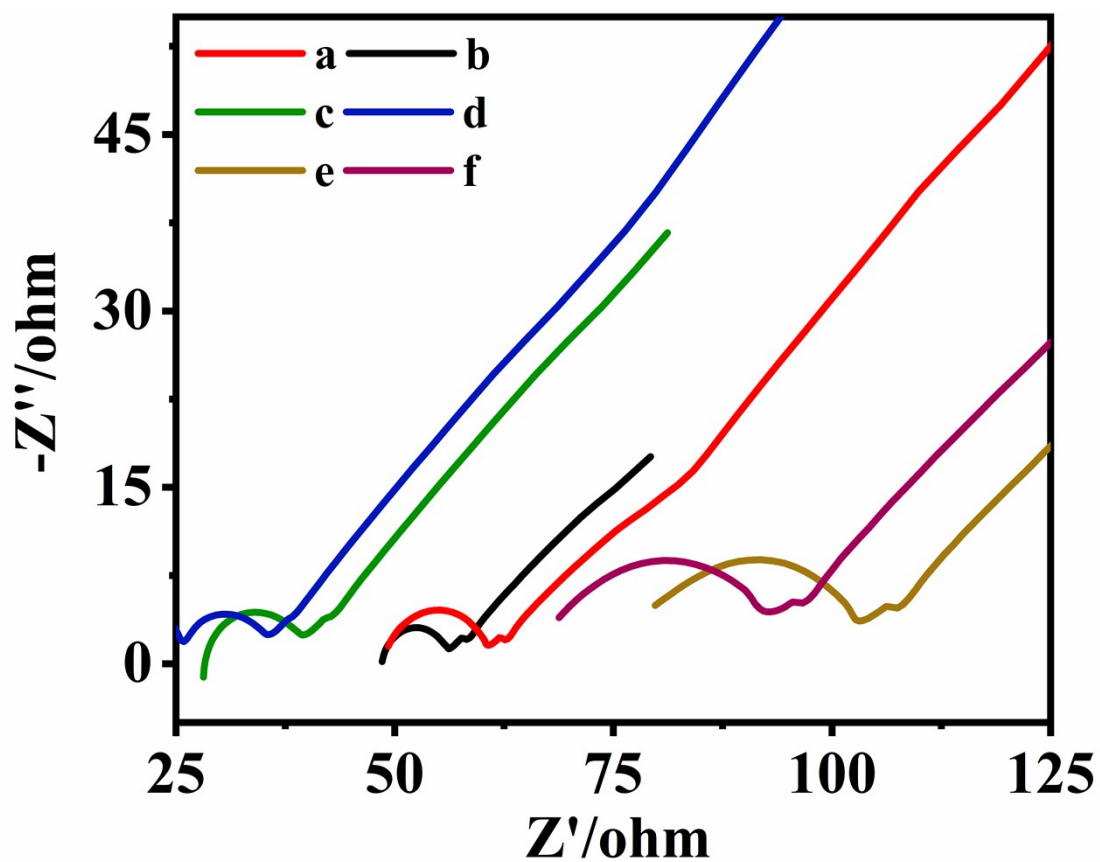

**Fig. S6.** EIS spectra in 0.1M KCl solution containing 5mM  $[\text{Fe}(\text{CN})_6]^{3-/4-}$  of  $\text{Fe}_2\text{TiO}_5$  (a) and  $\text{Fe}_2\text{TiO}_5$ -Light (b) and Ti precursor (c) and Ti precursor-Light (d) and ITO (e) and ITO-Light (f).

**Table S1**Atom parameters for Fe<sub>2</sub>TiO<sub>5</sub> in the space group  $D_{2h}^{17}$ -Cmcm the following points occupied

| Atom            | Wyckoff position | x | y      | z      |
|-----------------|------------------|---|--------|--------|
| Fe <sub>1</sub> | (8f)             | 0 | 0.1360 | 0.5642 |
| Ti <sub>1</sub> | (8f)             | 0 | 0.1360 | 0.5642 |
| Fe <sub>2</sub> | (4c)             | 0 | 0.1890 | 0.2500 |
| Ti <sub>2</sub> | (4c)             | 0 | 0.1890 | 0.2500 |
| O <sub>1</sub>  | (4c)             | 0 | 0.7660 | 0.2500 |
| O <sub>2</sub>  | (8f)             | 0 | 0.0480 | 0.1170 |
| O <sub>3</sub>  | (8f)             | 0 | 0.3110 | 0.0700 |

**Table S2**

Performance comparison of the different PEC biosensors for glucose detection.

| Catalysts                                      | Linear range (mM) | LOD( $\mu$ M) | Ref.             |
|------------------------------------------------|-------------------|---------------|------------------|
| BiOI/NiO/ITO                                   | 0-10              | 1.6           | [1]              |
| a-MoS <sub>x</sub> /RGO/ITO                    | 0.015-16          | 100           | [2]              |
| GOD/HNF-TiO <sub>2</sub> /GC                   | 0.002-3.17        | 0.8           | [3]              |
| TiO <sub>2</sub> (G)                           | 0.5-28            | 110           | [4]              |
| ZnIn <sub>2</sub> S <sub>4</sub>               | 0.08-30           | 27            | [5]              |
| NiO/CdS/GOD/ITO                                | 0.05-7.1          | 10            | [6]              |
| AuNi NDAs                                      | 0.005-15          | 4             | [7]              |
| AuNPs/ZnO                                      | 1-6.917           | 0.1           | [8]              |
| Al/ZnO                                         | 0.02-2            | 20            | [9]              |
| <b>Fe<sub>2</sub>TiO<sub>5</sub> nanodisks</b> | <b>0-10</b>       | <b>0.588</b>  | <b>This work</b> |

## Reference:

- [1] L. Zhang, Y. F. Ruan, Y. Y. Liang, W. W. Zhao, X. D. Yu, J. J. Xu, H. Y. Chen, *ACS Appl. Mater. Interfaces*, 2018. **10**, 3372-3379.
- [2] M. Shang, H. Qi, C. Du, H. Huang, S. Wu, J. Zhang, W. Song, *Sensor. Actuat. B-Chem.*, 2018. **266**, 71-79.
- [3] Q. Guo, L. Liu, M. Zhang, H. Hou, Y. Song, H. Wang, B. Zhong, L. Wang, *Biosens. Bioelectron.*, 2017. **92**, 654-660.
- [4] M. Nallal, G. Anantha Iyengar, K. Pill-Lee, *ACS Appl. Mater. Interfaces*, 2017. **9**, 37166-37183.
- [5] Y. Yang, J. Yang, Y. He, Y. Li, *Sensor. Actuat. B-Chem.*, 2021. **330**, 129302.
- [6] G. L. Wang, K. L. Liu, Y. M. Dong, X. M. Wu, Z. J. Li, C. Zhang, *Biosens. Bioelectron.*, 2014. **62**, 66-72.
- [7] L. F. Wang, W. Q. Zhu, W. B. Lu, L. N. Shi, R. Wang, R. X. Pang, Y. Y. Cao, F. Wang, X. H. Xu, *Biosens. Bioelectron.*, 2019. **142**, 111577.
- [8] Z. Ye, F. Miao, B. Tao, Y. Zang, P. K. Chu, *Ionics*, 2021. **27**, 4449-4459.
- [9] J. Ghosh, R. Ghosh, P. K. Giri, *Sensor. Actuat. B-Chem.*, 2018. **254**, 681-689.
